# Supplementary material for: Recommended physical activity and all cause and cause specific mortality in US adults: prospective cohort study
Source: PubMed Central journal article supplement — BMJ. 2020 Jul 1;370:m2031. doi: 10.1136/bmj.m2031 (PMC7328465; doi:10.1136/bmj.m2031), 2020-07-01
Supplement: zham054864.ww.pdf [file zham054864.ww.pdf]

## Supplemental Material

**Supplemental Figure 1:** The distribution of US adults who met 2018 physical activity guidelines according to sex and age.....2

**Supplemental Table 1:** Association between intensities of aerobic physical activity and all-cause and cause-specific mortality .....3

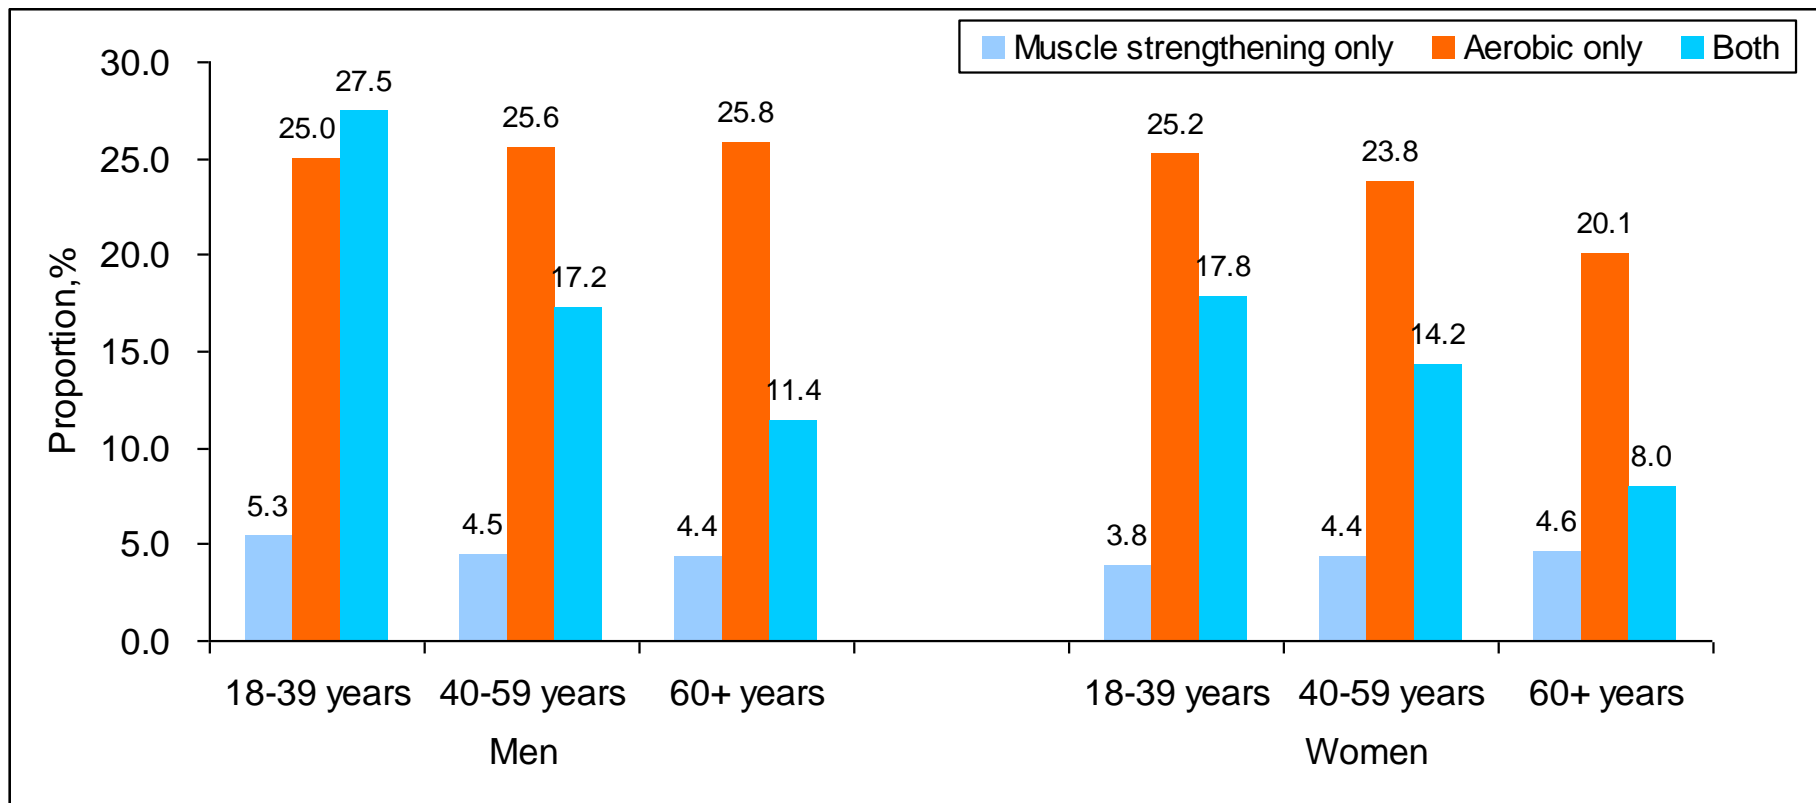

**Supplemental Figure 1:** The distribution of US adults who met 2018 physical activity guidelines according to sex and age

**Supplemental Table 1: Association between intensities of aerobic physical activity and all-cause and cause-specific mortality. Values are hazard ratios (95% confidence intervals)**

| Cause of death                              | Light-to-moderate intensity |                       | Vigorous intensity   |                      |
|---------------------------------------------|-----------------------------|-----------------------|----------------------|----------------------|
|                                             | <150<br>minutes/week        | ≥150<br>minutes /week | <75<br>minutes /week | ≥75<br>minutes /week |
| <b>Total population</b>                     |                             |                       |                      |                      |
| All causes                                  | 1.00                        | 0.79 (0.77 to 0.81)   | 1.00                 | 0.69 (0.67 to 0.71)  |
| Cardiovascular disease                      | 1.00                        | 0.72 (0.68 to 0.77)   | 1.00                 | 0.62 (0.58 to 0.67)  |
| Cancer                                      | 1.00                        | 0.83 (0.79 to 0.87)   | 1.00                 | 0.74 (0.70 to 0.78)  |
| Chronic lower respiratory tract disease     | 1.00                        | 0.56 (0.49 to 0.63)   | 1.00                 | 0.33 (0.27 to 0.39)  |
| Accidents and injuries                      | 1.00                        | 0.84 (0.74 to 0.96)   | 1.00                 | 0.82 (0.72 to 0.93)  |
| Alzheimer's disease                         | 1.00                        | 0.78 (0.66 to 0.92)   | 1.00                 | 0.74 (0.59 to 0.94)  |
| Diabetes mellitus                           | 1.00                        | 0.71 (0.61 to 0.84)   | 1.00                 | 0.59 (0.48 to 0.72)  |
| Influenza and pneumonia                     | 1.00                        | 0.71 (0.58 to 0.88)   | 1.00                 | 0.46 (0.36 to 0.60)  |
| Nephritis, nephrotic syndrome and nephrosis | 1.00                        | 0.65 (0.53 to 0.80)   | 1.00                 | 0.57 (0.44 to 0.74)  |
| <b>Adults with any chronic condition</b>    |                             |                       |                      |                      |
| All causes                                  | 1.00                        | 0.75 (0.72 to 0.77)   | 1.00                 | 0.64 (0.61 to 0.66)  |
| Cardiovascular disease                      | 1.00                        | 0.68 (0.64 to 0.72)   | 1.00                 | 0.56 (0.51 to 0.61)  |
| Cancer                                      | 1.00                        | 0.81 (0.76 to 0.86)   | 1.00                 | 0.69 (0.64 to 0.74)  |
| Chronic lower respiratory tract disease     | 1.00                        | 0.51 (0.44 to 0.59)   | 1.00                 | 0.33 (0.27 to 0.42)  |
| Accidents and injuries                      | 1.00                        | 0.76 (0.63 to 0.92)   | 1.00                 | 0.62 (0.49 to 0.78)  |
| Alzheimer's disease                         | 1.00                        | 0.75 (0.61 to 0.92)   | 1.00                 | 0.79 (0.60 to 1.05)  |
| Diabetes mellitus                           | 1.00                        | 0.64 (0.53 to 0.76)   | 1.00                 | 0.51 (0.41 to 0.64)  |
| Influenza and pneumonia                     | 1.00                        | 0.70 (0.54 to 0.89)   | 1.00                 | 0.44 (0.32 to 0.60)  |
| Nephritis, nephrotic syndrome and nephrosis | 1.00                        | 0.59 (0.47 to 0.73)   | 1.00                 | 0.48 (0.37 to 0.64)  |

Cox proportional hazards regression models were adjusted for sex, age, race/ethnicity, education, marital status, body mass index, smoking, alcohol intake and chronic conditions (when appropriate) and mutually adjusted for both light-to-moderate and vigorous-intensity activities.
